# Supplementary material
Source: publisher figshare collection journal article supplement (https://acs.figshare.com/ndownloader/files/4503466)
Supplement: Supplementary file 1 [file 4503466]

Liquid-phase Synthesis of Uniformly Nano-sized  $\text{LiMnPO}_4$  Particles and Their  
Electrochemical Properties for Lithium-ion Batteries

Takayuki Doi,<sup>\*,†</sup> Shota Yatomi,<sup>‡</sup> Tetsuya Kida,<sup>‡</sup> Shigeto Okada,<sup>†</sup> Jun-ichi Yamaki<sup>†</sup>

<sup>†</sup>Institute for Materials Chemistry and Engineering, Kyushu University, 6-1  
Kasuga-koen, Kasuga 816-8580, Japan

<sup>‡</sup>Interdisciplinary Graduate School of Engineering Sciences, Kyushu University, 6-1  
Kasuga-koen, Kasuga 816-8580, Japan

\* Corresponding author. Tel.: +81-92-583-7657, fax: +81-92-583-7791

*E-mail address:* doi@cm.kyushu-u.ac.jp (Takayuki Doi)

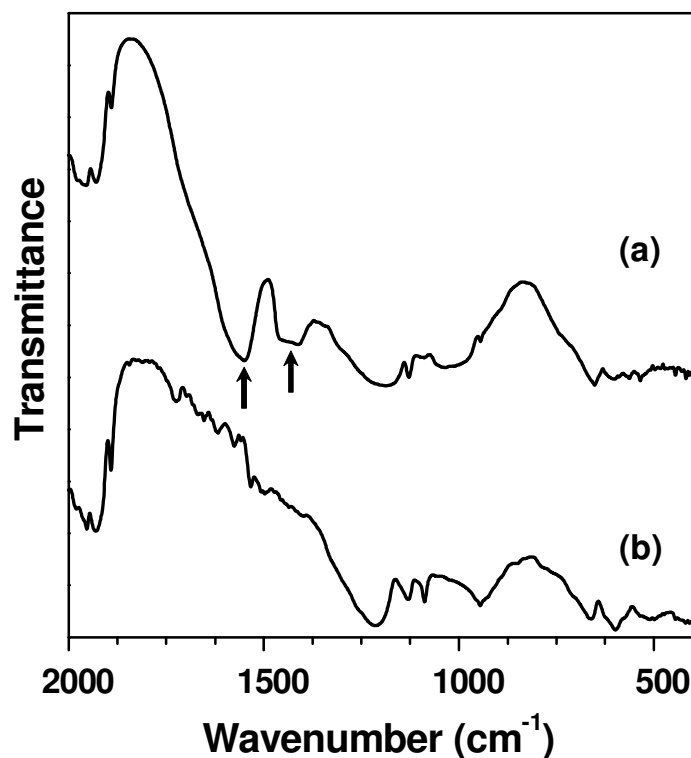

Fig. 1S. FT-IR spectra of (a) LiMnPO<sub>4</sub> particles prepared at 280 °C and (b) LiMnPO<sub>4</sub> powder prepared by a conventional solid-phase synthesis.

The LiMnPO<sub>4</sub> powder was prepared by a conventional solid-phase synthesis as follows: a mixture of lithium carbonate (98 %), dimanganese trioxide (99.9 %) and diphosphorus pentaoxide (98 %) in a Li/Mn/P ratio of 1/1/1 was fired at 500 °C for 15 h in air. The resultant powder was ground and sintered at 800 °C for 36 h in air. The particle size of the LiMnPO<sub>4</sub> powder was ca. 30 μm. FT-IR spectra of the particles were obtained by accumulating 200 iterations with a resolution of 4 cm<sup>-1</sup> using a spectrometer (FT-IR, FT/IR-680plus, Jasco). The nano-sized LiMnPO<sub>4</sub> particles gave a spectrum very similar to that of the LiMnPO<sub>4</sub> powder, except for two peaks at around 1450 and 1550 cm<sup>-1</sup>. Based on the literature, these two bands were identified as symmetric and antisymmetric stretching bands of a carboxyl group, respectively.<sup>17</sup> The gap between these two bands was about 100 cm<sup>-1</sup>, indicating that oleic acid was attached to the LiMnPO<sub>4</sub> particles.

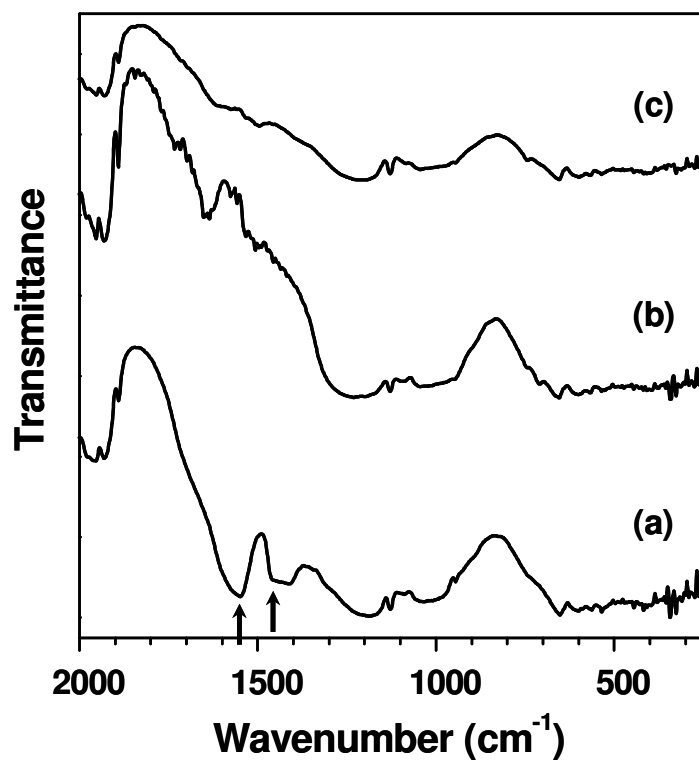

Fig. 2S. FT-IR spectra of  $\text{LiMnPO}_4$  particles (a) before and after heat treatment in (b)  $\text{O}_2$  or (c) Ar at 500  $^{\circ}\text{C}$  for 1 h.

The peaks at around 1450 and 1550  $\text{cm}^{-1}$ , which are assigned to carboxyl groups of oleic acid, disappeared with heat treatment at 500  $^{\circ}\text{C}$  for 1h in Ar and  $\text{O}_2$ ; a peak at around 1650  $\text{cm}^{-1}$  was observed after heat treatment in  $\text{O}_2$ , likely due to  $\text{Li}_3\text{PO}_4$ . Thus, oleic acid molecules attached to  $\text{LiMnPO}_4$  particles could be removed by heat treatment.

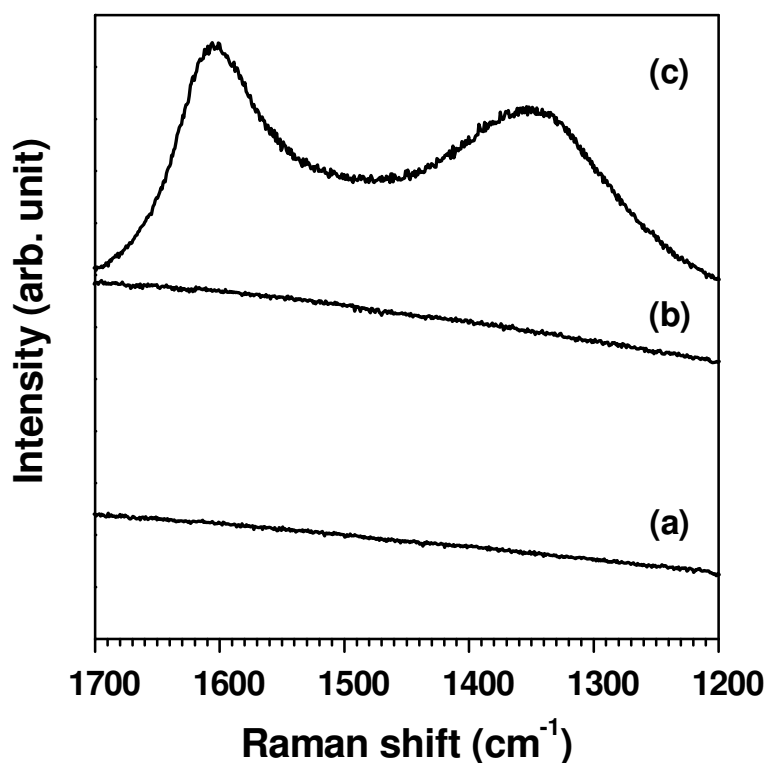

Fig. 3S. Raman spectra of LiMnPO<sub>4</sub> particles (a) before and after heat treatment in (b) O<sub>2</sub> or (c) Ar at 500 °C for 1 h.

Raman spectra were excited using the 514.5 nm line (100mW) of an argon ion laser for 60 s, and the scattered light was collected in a quasi-backscattering geometry (NRS-2100, Jasco). Two broad peaks appeared at around 1360 and 1600 cm<sup>-1</sup> after heat treatment in Ar (Fig. S3c), while no peak was observed after heat treatment in O<sub>2</sub> (Fig. S3b). These results indicate that carbonaceous materials with low crystallinity were formed from oleic acid by heat treatment in Ar.
